# Supplementary material
Source: HighWire-hosted journal article supplement (https://bmjopensem.bmj.com/content/suppl/2023/01/19/9.1.e001498)
Supplement: bmjsem-2022-001498supp002_data_supplement.pdf [file bmjsem-2022-001498supp002_data_supplement.pdf]

## Appendix B - Additional clinical examination findings

**Participant reported pain locations during abdominal resistance tests for n=61 symptomatic sides (average of both examiners).**

| Resistance tests<br>(n=61)                      | Pain in the<br>inguinal<br>canal region | Pain in region of other entities |           |       |       |
|-------------------------------------------------|-----------------------------------------|----------------------------------|-----------|-------|-------|
|                                                 |                                         | Adductor                         | Iliopsoas | Pubic | Other |
| Straight sit-up 0°                              | 23%                                     | 8%                               | 0%        | 0%    | 10%   |
| Cross test - shoulder<br>affected side          | 21%                                     | 3%                               | 0%        | 0%    | 8%    |
| Cross test - shoulder<br>contralateral side     | 38%                                     | 18%                              | 7%        | 0%    | 10%   |
| Straight sit-up 45°                             | 30%                                     | 7%                               | 0%        | 0%    | 10%   |
| Oblique sit-up - shoulder<br>affected side      | 15%                                     | 3%                               | 0%        | 0%    | 8%    |
| Oblique sit-up - shoulder<br>contralateral side | 30%                                     | 8%                               | 0%        | 0%    | 10%   |

**Average prevalence of participant-reported palpation pain NOT related to their injury in symptomatic and asymptomatic sides (n=88).**

| Abdominal palpation tests              | Pain NOT related to<br>injury |
|----------------------------------------|-------------------------------|
| Rectus abdominis insertion             | 11%                           |
| Rectus abdominis muscle/tendon         | 2%                            |
| Pubic tubercle                         | 9%                            |
| Inguinal ligament                      | 6%                            |
| External ring (medial border)          | 11%                           |
| External ring <sup>a</sup>             | 16%                           |
| Conjoint tendon <sup>a</sup>           | 16%                           |
| Posterior wall (Valsalva) <sup>a</sup> | 23%                           |

<sup>a</sup>Palpation tests during scrotal invagination

Mean prevalence of positive tests in athletes classified with defined inguinal-related groin pain (examiner A: n=41, examiner B: n=37), and “all” (defined+likely) inguinal-related groin pain (examiner A: n=52, examiner B: n=42).

| Abdominal palpation                                                  | Mean prevalence of positive tests in defined inguinal-related groin pain | Mean prevalence of positive tests in “all” (defined+likely) inguinal-related groin pain |
|----------------------------------------------------------------------|--------------------------------------------------------------------------|-----------------------------------------------------------------------------------------|
| Pubic tubercle                                                       | 66%                                                                      | 56%                                                                                     |
| Inguinal ligament                                                    | 58%                                                                      | 49%                                                                                     |
| External ring (medial border)                                        | 59%                                                                      | 49%                                                                                     |
| External ring                                                        | 55%                                                                      | 46%                                                                                     |
| Conjoint tendon                                                      | 54%                                                                      | 45%                                                                                     |
| Posterior wall (during Valsalva)                                     | 79%                                                                      | 66%                                                                                     |
| <b>Any inguinal palpation pain without invagination <sup>a</sup></b> | <b>77%</b>                                                               | <b>64%</b>                                                                              |
| <b>Any inguinal palpation pain DURING invagination <sup>b</sup></b>  | <b>94%</b>                                                               | <b>78%</b>                                                                              |
| <b>Any inguinal palpation pain (without/during) invagination</b>     | <b>100%</b>                                                              | <b>83%</b>                                                                              |
| Abdominal resistance                                                 | Mean prevalence of positive tests in IRGP                                | Mean prevalence of positive tests in IRGP                                               |
| Straight sit-up 0°                                                   | 30%                                                                      | 34%                                                                                     |
| Cross test - shoulder affected side                                  | 27%                                                                      | 28%                                                                                     |
| Cross test - shoulder contralateral side <sup>c</sup>                | 49%                                                                      | 48%                                                                                     |
| Straight sit-up 45°                                                  | 38%                                                                      | 38%                                                                                     |
| Oblique sit-up - shoulder affected side                              | 21%                                                                      | 20%                                                                                     |
| Oblique sit-up - shoulder contralateral side <sup>c</sup>            | 39%                                                                      | 38%                                                                                     |
| <b>Pain during any abdominal resistance test</b>                     | <b>58%</b>                                                               | <b>57%</b>                                                                              |

<sup>a</sup> If any of the above 3 tests (pubic tubercle, inguinal ligament, external ring (medial border)) were scored positive

<sup>b</sup> If any of the above 3 test (external ring, conjoint tendon, posterior wall) were scored positive

<sup>c</sup> Pain reported on the contralateral side (e.g. patient reported recognizable injury pain in the *left* inguinal canal region during an oblique sit-up with resistance on the *right* shoulder)
